# Supplementary material for: Milk proteome from in silico data aggregation allows the identification of putative biomarkers of negative energy balance in dairy cows
Source: PubMed Central journal article supplement (PMC6609625; doi:10.1038/s41598-019-46142-7), 2019-07-04
Supplement: 41598_2019_46142_MOESM1_ESM.pdf [file 41598_2019_46142_MOESM1_ESM.pdf]

**Milk proteome from *in silico* data aggregation allows the identification of putative biomarkers of negative energy balance in dairy cows**

Mylène Delosière<sup>1\*</sup>, José Pires<sup>1</sup>, Laurence Bernard<sup>1</sup>, Isabelle Cassar-Malek<sup>1</sup>, Muriel Bonnet<sup>1</sup>

<sup>1</sup> Université Clermont Auvergne, INRA, VetAgro Sup, UMR Herbivores, F-63122 Saint-Genès-Champanelle, France

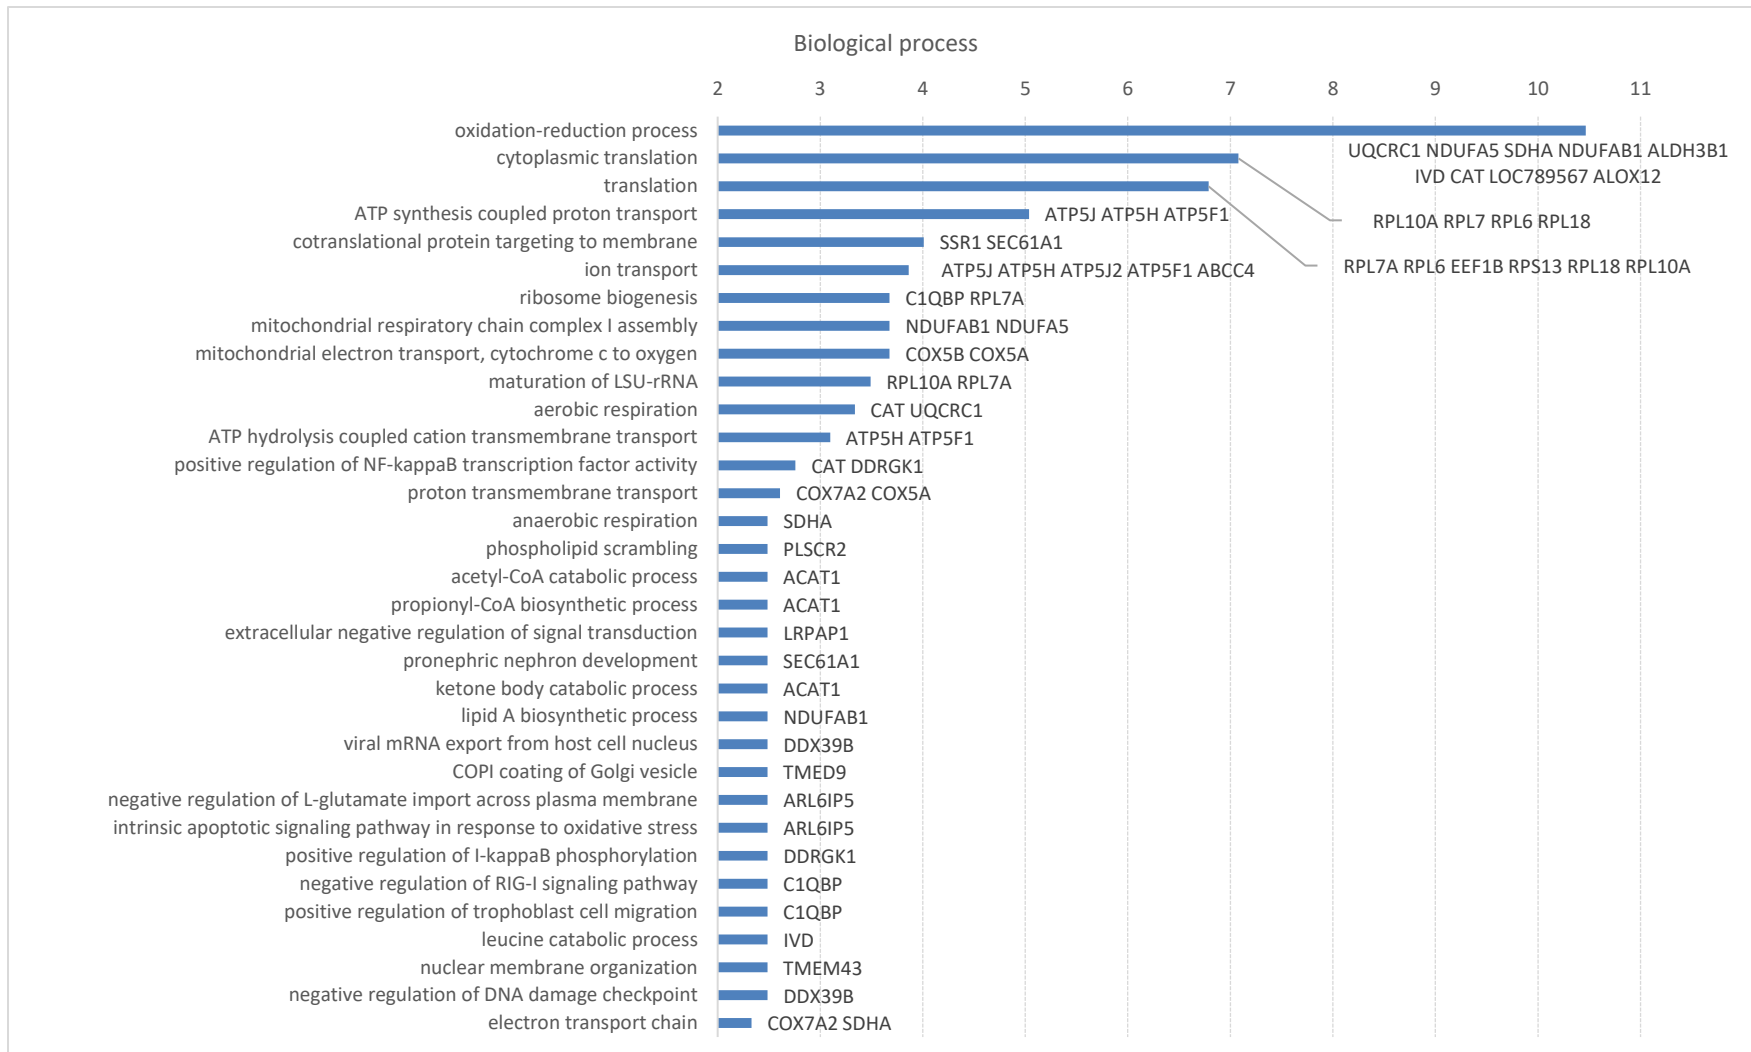

Supplementary Figure 1: The enriched Gene Ontology terms of the Biological Process ontology group annotated 52 proteins among the 59 exclusively detected in early lactation milk. The results were obtained with ProteINSIDE, and enrichments are expressed as  $-\log_{10}(P \text{ value})$ .  $\log_{10}(P \text{ value})$  of 3, 2, and 1.3 in the X-axis correspond to a P value of 0.001, 0.01 and 0.05, respectively. P values were corrected by the Benjamini and Hochberg test. The protein gene names annotated by a GO term are listed.

Supplementary Table 1: Lists of the common 95 gene names (GN) from all milk fractions (skimmed, whey, MFM, exosomes) and of the 105 GN from all lactation stages (colostrum, early, peak, mid-lactation and drying-off)

| Common GN present in all fractions | Common GN present in all lactation stages |
|------------------------------------|-------------------------------------------|
| <b>95</b>                          | <b>105</b>                                |
| ABCG2                              | A1BG                                      |
| ACTB                               | A2M                                       |
| AHSG                               | ACTB                                      |
| ANXA1                              | AHSG                                      |
| ANXA2                              | ALB                                       |
| APOA1                              | APOA1                                     |
| APOA4                              | APOA4                                     |
| APOE                               | APOE                                      |
| ARHGDI1                            | AZGP1                                     |
| AZGP1                              | B2M                                       |
| B2M                                | B4GALT1                                   |
| B4GALT1                            | BTN1A1                                    |
| BTN1A1                             | C1S                                       |
| C3                                 | C3                                        |
| C9                                 | C6                                        |
| CATHL1                             | C7                                        |
| CD14                               | C9                                        |
| CD36                               | CATHL1                                    |
| CD5L                               | CATHL2                                    |
| CD9                                | CATHL6                                    |
| CDC42                              | CD14                                      |
| CFL1                               | CD36                                      |
| CLEC3B                             | CD5L                                      |
| CLU                                | CFB                                       |
| CRISP3                             | CFD                                       |
| CSN1S1                             | CFH                                       |
| CSN2                               | CFI                                       |
| EEF1A1                             | CHI3L1                                    |
| EEF2                               | CLEC3B                                    |
| EZR                                | CLU                                       |
| F2                                 | CP                                        |
| FABP3                              | CREG1                                     |
| FASN                               | CRISP3                                    |
| FGA                                | CSN1S1                                    |
| FGB                                | CSN1S2                                    |
| FGFBP1                             | CSN2                                      |
| FGG                                | CSN3                                      |
| FN1                                | CTSB                                      |
| FOLR1                              | DAG1                                      |

|          |         |
|----------|---------|
| GC       | F2      |
| GDI2     | FABP3   |
| GGT1     | FGA     |
| GLYCAM1  | FGB     |
| GP2      | FGFBP1  |
| GRN      | FGG     |
| GSN      | FN1     |
| HEBP1    | FOLR1   |
| HHIPL2   | GC      |
| HSP90AA1 | GGT1    |
| HSP90AB1 | GLYCAM1 |
| HSPA5    | GP2     |
| HSPA8    | GRN     |
| HSPB1    | GSN     |
| IDH1     | HP      |
| IGJ      | HPX     |
| ITIH4    | HSPA5   |
| LBP      | IDH1    |
| LPL      | IGJ     |
| LPO      | ITIH1   |
| LTF      | ITIH4   |
| MFGE8    | KNG1    |
| MUC1     | KNG2    |
| MUC15    | KRT1    |
| NPC2     | LALBA   |
| NUCB1    | LBP     |
| ORM1     | LGB     |
| P4HB     | LPL     |
| PIGR     | LPO     |
| PLIN2    | LRG1    |
| PPIA     | LTF     |
| PRDX1    | MFGE8   |
| RAB18    | MUC1    |
| RAB1A    | NME2    |
| RAB5C    | NPC2    |
| RAB7A    | NUCB1   |
| RAP1B    | NUCB2   |
| RHOA     | ORM1    |
| RNASE4   | OS9     |
| S100A8   | P4HB    |
| S100A9   | PGLYRP1 |
| SAA3     | PIGR    |
| SCGB1D   | PLG     |
| SELENBP1 | PLIN2   |
| SELENOF  | PPIA    |
| SERPINA1 | PSAP    |

|         |            |
|---------|------------|
| SLC34A2 | PTGDS      |
| TF      | QSOX1      |
| TXN     | RNASE4     |
| UGP2    | SCGB1D     |
| VIM     | SDF4       |
| WARS    | SERPINA1   |
| XDH     | SERPINA3-1 |
| YWHAB   | SERPINA3-3 |
| YWHAE   | SERPINA3-7 |
| YWHAZ   | SERPINA3-8 |
|         | SERPINB1   |
|         | SERPINC1   |
|         | SERPIND1   |
|         | SERPINF1   |
|         | SERPINF2   |
|         | SIL1       |
|         | SPP1       |
|         | TF         |
|         | TTR        |
|         | XDH        |
